# Supplementary material
Source: PubMed Central journal article supplement (PMC2775449)
Supplement: NIHMS126362-supplement-1.pdf [file NIHMS126362-supplement-1.pdf]

## SUPPLEMENTAL METHODS

### Intravital microscopy

Phase contrast intravital microscopy was utilized to measure leukocyte rolling/min as described previously.<sup>1, 2</sup> Mice were anesthetized with intraperitoneal injection of tribromoethanol (Fluka, 0.015 mg/g). Rhodamine6G (0.67 mg/kg)<sup>3</sup> was injected to illuminate circulating nucleated blood cells and was visualized using fluorescence intravital microscopy.<sup>2</sup> Venules with average diameter of 125  $\mu\text{m}$  and an average shear rate of 150  $\text{s}^{-1}$  were visualized using a Zeiss IM35 inverted microscope equipped with 10x/0.25 objective lenses (Zeiss). A doppler flow meter was employed to calculate shear rates. Video and images were recorded with a SVHS Panasonic AG-6720A video recorder (Matsushita Electric) and a CCD video camera (Hamamatsu Photonics Systems). Image processing was conducted with Adobe Premiere 6.0 (Adobe Systems).

The numbers of rolling leukocytes/min were quantified by counting the leukocytes passing through a perpendicular plane in 1 min. An average of four counts per venule were taken for one or two venules per mouse. Leukocyte velocity was calculated as the distance ( $\mu\text{m}$ ) traveled per second. The leukocyte velocity for 12 or more leukocytes per venule was calculated and data from several mice was pooled. The values are presented as the average  $\pm$  S.E.M.

### In vivo detection of P-selectin expression on endothelial surface

Yellow/green (excitation/emission, 505 nm/515 nm) and red (excitation/emission, 580 nm/605 nm) carboxylate-modified microspheres (1.0  $\mu\text{m}$  diameter) (Invitrogen) were covalently coupled to anti-P-selectin monoclonal antibody RB40.34 or control rat IgG1k (BD-Pharmingen), respectively, according to the manufacturer's instructions. Mice were injected intravenously with  $0.2 \times 10^9$  of anti-P-selectin conjugated-FITC beads or IgG conjugated (control)-beads and mesenteric veins were visualized immediately using fluorescent intravital microscopy as described above. Images of 1 to 3 venules per mouse were

captured and the density (number of beads/mm<sup>2</sup>) of bound anti-P-selectin and control beads were quantified in Ad-sFlt1, Ad-sEng and Ad-null-expressing mice.

### VWF ELISA

For measurement of plasma VWF, plates were coated overnight at 4°C with polyclonal rabbit anti-human VWF (15 mg/ml in 50 mM sodium carbonate buffer (pH 9.6)). Plasma (1:20 dilution in PBS) was incubated for 1 hr at 37°C. After washing, a polyclonal anti-human VWF coupled to peroxidase (1:1000) was added. Following 3,3',5,5'-tetramethylbenzidine substrate color development, the reaction was terminated with 1N, H<sub>2</sub>SO<sub>4</sub> and the absorbance was read at 450 nm.

1. Mayadas TN, Johnson RC, Rayburn H, Hynes RO, Wagner DD. Leukocyte rolling and extravasation are severely compromised in P selectin-deficient mice. *Cell*. 1993;74:541-554.
2. Frenette PS, Johnson RC, Hynes RO, Wagner DD. Platelets roll on stimulated endothelium in vivo: an interaction mediated by endothelial P-selectin. *Proc Natl Acad Sci U S A*. 1995;92:7450-7454.
3. Eriksson EE, Werr J, Guo Y, Thoren P, Lindbom L. Direct observations in vivo on the role of endothelial selectins and alpha(4) integrin in cytokine-induced leukocyte-endothelium interactions in the mouse aorta. *Circ Res*. 2000;86:526-533.
